# Supplementary material for: Reviving Ukraine’s Economy through Indian Agricultural Expertise: A Post-Conflict Renaissance
Source: Research Square preprint supplement (doi:10.21203/rs.3.rs-7633244/v1), 2025-10-06
Supplement: Supplementary file 1 [file 8420cf872f19a3e418c93037.docx]

SUPPLEMENTARY INFORMATION 1: Literature Review - Extended Tables and Figures

# Agriculture Post Conflict

Supporting Pastoralism and Agriculture in Recurrent & Protracted Crises’ post-conflict piece,(Wiggins S. C., Farming after fighting: Agricultural recovery after conflict, 2023)provided to be crucial as the foundation of this study. The Figure below and graphs are the justifications as to why Ukraine holds massive potential for recovery.

The Figure below showcases agricultural growth for the years of and post conflict of 6 nations as recorded in ‘*Farming after Fighting’* (Wiggins S. C., Farming after fighting: Agricultural recovery after conflict, 2023) By Supporting Pastoralism and Agriculture in Recurrent & Protracted Crises’

| **Country** | **Conflict Years** | **First 10 Years** | **Subsequent Years** | **Conflict Change (%)** | **Recovery 1-10 (%)** | **Recovery 11+ (%)** |
| --- | --- | --- | --- | --- | --- | --- |
| Cambodia | 1971-1979 | 1991-2001 | 2001-2019 | -66 | 57 | 199 |
| Mozambique | 1977-1992 | 1992-2002 | 2002-2019 | 17 | 52 | 87 |
| Peru | 1980-1992 | 1992-2002 | 2002-2019 | 17 | 52 | 28 |
| Peru: Potatoes | 1980-1992 | 2003-2013 | 2013-2019 | 37 | 101 | 12 |
| Rwanda | 1990-1994 | 1994-2004 | 2004-2019 | -40 | 105 | 173 |
| Sierra Leone | 1991-2002 | 2002-2012 | 2012-2019 | -33 | 96 | 54 |
| Uganda | 1986-2004 | 2004-2014 | 2014-2019 | 78 | -9 | -3 |
| Uganda: Millet | 1987-2004 | 2005-2014 | 2015-2019 | 28 | -57 | 70 |

Table 1 Agricultural Growth For Years Of Conflict And Years Since Conflict: Value Of Agricultural Production (Constant Terms) (Wiggins S. C., Farming after fighting: Agricultural recovery after conflict, 2023)

This comparative analysis of post-conflict agricultural recovery provides the foundation for understanding Ukraine's potential trajectory. The projections from SPARC's 'Farming after Fighting' report (Wiggins S. B., 2023)) demonstrates that smallholder farms consistently outperform larger commercial operations in post-conflict environments, even without significant state support

| **Country** | **Conflict Change (%)** | **Recovery 1-10 (%)** | **Recovery 11+ (%)** | **Country** | **Conflict Change (%)** | **Recovery 1-10 (%)** | **Recovery 11+ (%)** |
| --- | --- | --- | --- | --- | --- | --- | --- |
| Cambodia | -54 | 16 | 189 | Cambodia | -54 | 16 | 189 |
| Mozambique | 47 | 42 | 30 | Mozambique | 47 | 42 | 30 |
| Peru | 11 | 20 | - | Peru | 11 | 20 | - |
| Peru: Potatoes | -34 | 229 | 7 | Peru: Potatoes | -34 | 229 | 7 |

Table 2 Change: Area Under Crops (Wiggins S. C., Farming after fighting: Agricultural recovery after conflict, 2023)

The above table conducts a study of the first 10 years and then subsequent years of recovery in the countries from the same report. The data shows above indicates remarkably interesting trends and insights. The results were taken from small holder farms. This highlights that that segment is the one with most potential for recovery. (Wiggins S. C., Farming after fighting: Agricultural recovery after conflict, 2023)

According to the same article (Wiggins S. C., Farming after fighting: Agricultural recovery after conflict, 2023), particularly noteworthy is that these farms operated without access to social capital, policies or even basic infrastructure agonist other major challenges. Small holder farms show incredible resilience which translates to economic recovery on a larger scale.

Below is the table which proves the above claim of small holder farm’s ability and potential to out produce larger investor backed commercial farms.

The Figure below highlights the change in value of production in constant terms & change in area under crops for the six nations in the years of and post conflict.

Figure 1 Change in Production & Area under Crops (Wiggins S. C., Farming after fighting: Agricultural recovery after conflict, 2023)

Figure 2 Change to Area Under Crops (Wiggins S. C., Farming after fighting: Agricultural recovery after conflict, 2023)

The resilience patterns observed in these case studies become particularly relevant when examining specific crop performance metrics. The matrix analysis below reveals which crops demonstrate the strongest recovery potential, providing direct insights for Ukraine's agricultural reconstruction strategy (Wiggins S. C., Farming after fighting: Agricultural recovery after conflict, 2023)

As indicative of the above figure, the data shows that this segment of real estate, in terms of farming, is resilient, steady, and prosperous without major state support. We can apply the same concept to Ukraine, which was the world's capital for sunflower oil and the largest exporter of wheat before the war. This supports the hypothesis that recovery potential can be substantial. (Wiggins S. C., Farming after fighting: Agricultural recovery after conflict, 2023).

The table below elaborates on the Country and Crop Matrix of Recovery Post Conflict.

| **Country & Crop** | **A. Production UP Y/N** | **B. Growth Post Conflict UP Y/N** | **C. 10 Years More Growth Y/N** | **D. Growth Post 10Y Faster Than Before Y/N** |
| --- | --- | --- | --- | --- |
| Cambodia Rice | Y | Y | Y | N |
| Cambodia Rubber | N | N | N | N |
| Mozambique Maize | Y | Y | Y | N |
| Mozambique Sugar | N | N | N | N |
| Peru Potato | N | Y | Y | N |
| Peru Quinoa | Y | Y | Y | N |
| Peru Asparagus | N | N | N | N |
| Rwanda Maize | Y | Y | Y | N |
| Rwanda Beans | Y | Y | Y | N |
| Sierra Leone Rice | Y | Y | Y | N |
| Sierra Leone Coffee | N | N | N | N |
| Sierra Leone Oil Palm | N | N | N | N |
| Uganda Millet | Y | Y | Y | Y |
| **Country & Crop** | **A. Production UP Y/N** | **B. Growth Post Conflict UP Y/N** | **C. 10 Years More Growth Y/N** | **D. Growth Post 10Y Faster Than Before Y/N** |

Figure 3 Matrix of Production Levels Post Conflict (Wiggins S. C., Farming after fighting: Agricultural recovery after conflict, 2023)

The matrix above shows various crops and their respective production levels in the first decade as well as the subsequent years, taken from the same report of *‘Farming after Fighting’* (Wiggins S. C., Farming after fighting: Agricultural recovery after conflict, 2023). From this data it is reasonable to assume that Ukraine has a high probability to recover faster under peace, given the importance of its trade and pre-conflict wheat production position.

While production recovery patterns appear promising, Ukraine faces a critical challenge that differentiates it from other post-conflict cases: severe demographic disruption. According to KSE Agrocenter analysis, the agricultural labour force has declined by over 13% since 2014, with the invasion intensifying migration outflows (Christoplos, 2004) & (Özerdem, 2016)

| **Indicator** | **2006** | **2013** | **2014** | **2021** | **2013 vs 2006 Growth (%)** | **2021 vs 2014 Growth (%)** |
| --- | --- | --- | --- | --- | --- | --- |
| 15–70 (1000s) | 20,730 | 20,404 | 18,073 | 15,610 | -1.6 | -13.6 |
| Primary Industry | 3,652 | 3,577 | 3,091 | 2,692 | -2.1 | -12.9 |
| %Employed in Primary Ind. | 17.6 | 17.5 | 17.1 | 17.2 | -0.1 | 0.1 |

Figure 4 Demographic Shift (State Statistics Service of Ukraine., 2022)

*‘Farming after Fighting’* (Wiggins S. C., Farming after fighting: Agricultural recovery after conflict, 2023)states that labour is the single most critical resource for small holder farms in a pot conflict setting but given the demographics dispersal in the recent years, it remains unclear how Ukraine can face this challenge.

# Impact of Conflict on Agriculture in Ukraine

Kyiv school of Economics (Kulish, 2025) was another foundational pillar in gauging and understanding the ground impact of the conflict on a granular level, *KSE’s 30.09.24 Losses* (Roman N., 2023)proved to be the best supporting article in understanding precisely the challenges and problems faced by commercial and in turn small holder farms in Ukraine. The Figure below and graphs are taken directly from the article. The overall value of the damages and losses for agricultural enterprises is estimated at USD 3.85 billion in the crop and livestock sectors. The crop sector accounts for USD 2.71 billion, while the livestock sector accounts for approximately USD 1.13 billion. On average, these damages and losses amount to approximately USD 147,000 per agricultural enterprise. *Ukraine: Impact of the War on Agricultural Enterprises ‘Page 8-9 Excerpts Key highlights.* (FAO, 2023)

The Figure below is derived from the same report from Kyiv School of Economics that shows input accessibility of producers who stopped purchases broken down by oblast.

Figure Production Loss due to Increase in Input Price (FAO, 2023)

On average, 27 percent of all farmers stopped purchasing from a provider because the provider charged too high prices, reflecting constraints on producers’ input accessibility and reported price concerns, according to (Food & Argiculture Organisation of United Nations, 2022)

The Figure below highlights the change in are & entities per crop in percentage terms for Ukraine under the conflict. These input accessibility constraints, documented by KSE Agrocenter’ s ongoing damage assessments, have forced Ukrainian producers to adapt their cropping strategies. The Food and Land Use Research Center estimates total agricultural losses exceeding $80 billion, creating unprecedented pressure for cost-effective farming alternatives (Pysar, 2020) and (Batsurovska, 2022).

Figure 6 Change in Area & Crop (FAO, 2023)

The increase in the number of enterprises planting vegetables and legumes can be understood as an effort to diversify production, a coping mechanism due to export and income limitations, not to mention the lack of labour caused by the conflict(FAO, 2023)

Figure 7 Decrease in Grain & Oil Crops (FAO, 2023)

With Ukraine being the world sunflower oil capital and a major exporter of rapeseed(Sobolev, 2024)the devastation of the front-line occupation severely cripples the economic engine. Exacerbating the problem at hand and exponentially increasing the losses in both direct and indirect ways.

(FAO, 2023) highlightsalmost 90 percent of agricultural enterprises involved in crop production reported a decrease in revenues, with over 70 percent of them recording a significant or drastic decrease. Agricultural enterprises involved in livestock production appeared to be less affected.

Figure 8 Decrease in Revenue for Crop & Livestock (FAO, 2023)

Figure Enterprise Damage & Losses (FAO, 2023)

All the above figures point to an overall decrease in production & livestock. This presents an opportunity to provide a better more suitable alternative given the serenity and plethora of challenges faced by Ukraine. As the hypothesis previously stated, Zero Budget Natural Farming is a perfectly suited techniques which addresses most of the concerns of small holder farmers in Ukraine; from increased costs of inputs such as fertilizer and seeds to adding benefits beyond conventional methods by being ESG driven, sustainable & scalable.

# War Related Losses in Ukraine

The data above verifies that production is to soon move to smallholder farms first before enterprises. This confirms the identification of smallholder farms as the target audience for this study.

The figure below displays the war related economic losses in Ukraine in the agricultural sector.

Figure 10 War Related Losses in Ukraine Excluding Lost Income (Kotykova, 2025).

The above & Figure below are a visual representation of the losses portrayed in ‘*Agriculture in Ukraine, Regional & Global Impacts*’ (Kotykova, 2025). The losses recorded in the above and below tables show the overall impacts of the conflict in the agricultural sector.

The Figure below describes the Economic losses in Ukraine including lost income.

Figure 11 Economic losses including income (Kotykova, 2025).

To summarize, the total agricultural losses, including lost income due to decreased production and increased production costs, amount to more than $40 billion, according to the *Food and Land Use Research Center of the Kyiv School of Economics*, this figure exceeds Ukraine's agricultural gross product in 2021. The largest category of losses is related to the decline in crop production, which amounts to $23 billion.

From the data, we can also reasonably establish that capital-intensive techniques, directly from the result of the loss of machinery & storage facilities, are out of commission for now until peace is restored and the necessary funds are mobilized to the correct sectors.

This only further reinforces the hypothesis of utilizing a scalable, low capex and sustainable technique for the agricultural sector in Ukraine.

Given these extensive capital losses and the disruption of conventional input supply chains as documented in post-conflict agricultural reconstruction studies (Development, 2024) and (ICARDA, 2017). Ukraine's agricultural recovery requires innovative approaches that minimize external dependencies. Zero Budget Natural Farming presents a potential solution, particularly suited to post-conflict environments where traditional capital-intensive methods are no longer viable. (Bulman, 2010)

# Zero Budget Natural Farming

ZBNF isn’t without its own constraints, according to the same report by NABARD a pure adoption of the technique in farm resulted in a net decrease in yields of wheat by nearly 59 percent, *“The simulation suggests that the wheat production decline with ZBNF methods, compared to the conventional method, can be 17.7 percent if 30 percent of the net sown area is covered under ZBNF, 29.5 percent in the case of 50 percent area, and 59 percent in case of complete conversion to ZBNF.”-NABARD Research Study No. 43 Zero Budget Natural Farming Pg 15.* This establishes that although the cost-benefit ratio is high it is not a perfect alternative to conventional methods, it may be utilized as a hybrid variant to offset costs and increase soil health & contribute toward an ESG driven and sustainable farm. The figure here displays a simplistic, minimal version of a ZBNF crop matrix. This crop matrix is well-suited to the soil and climatic conditions of Ukraine. This specific matrix also has the added benefit of growing fruits and berries, which, as previously established; ‘*Agriculture in Ukraine; Regional & Global Impacts; PG 11 Table 7.’* (Kotykova, 2025)


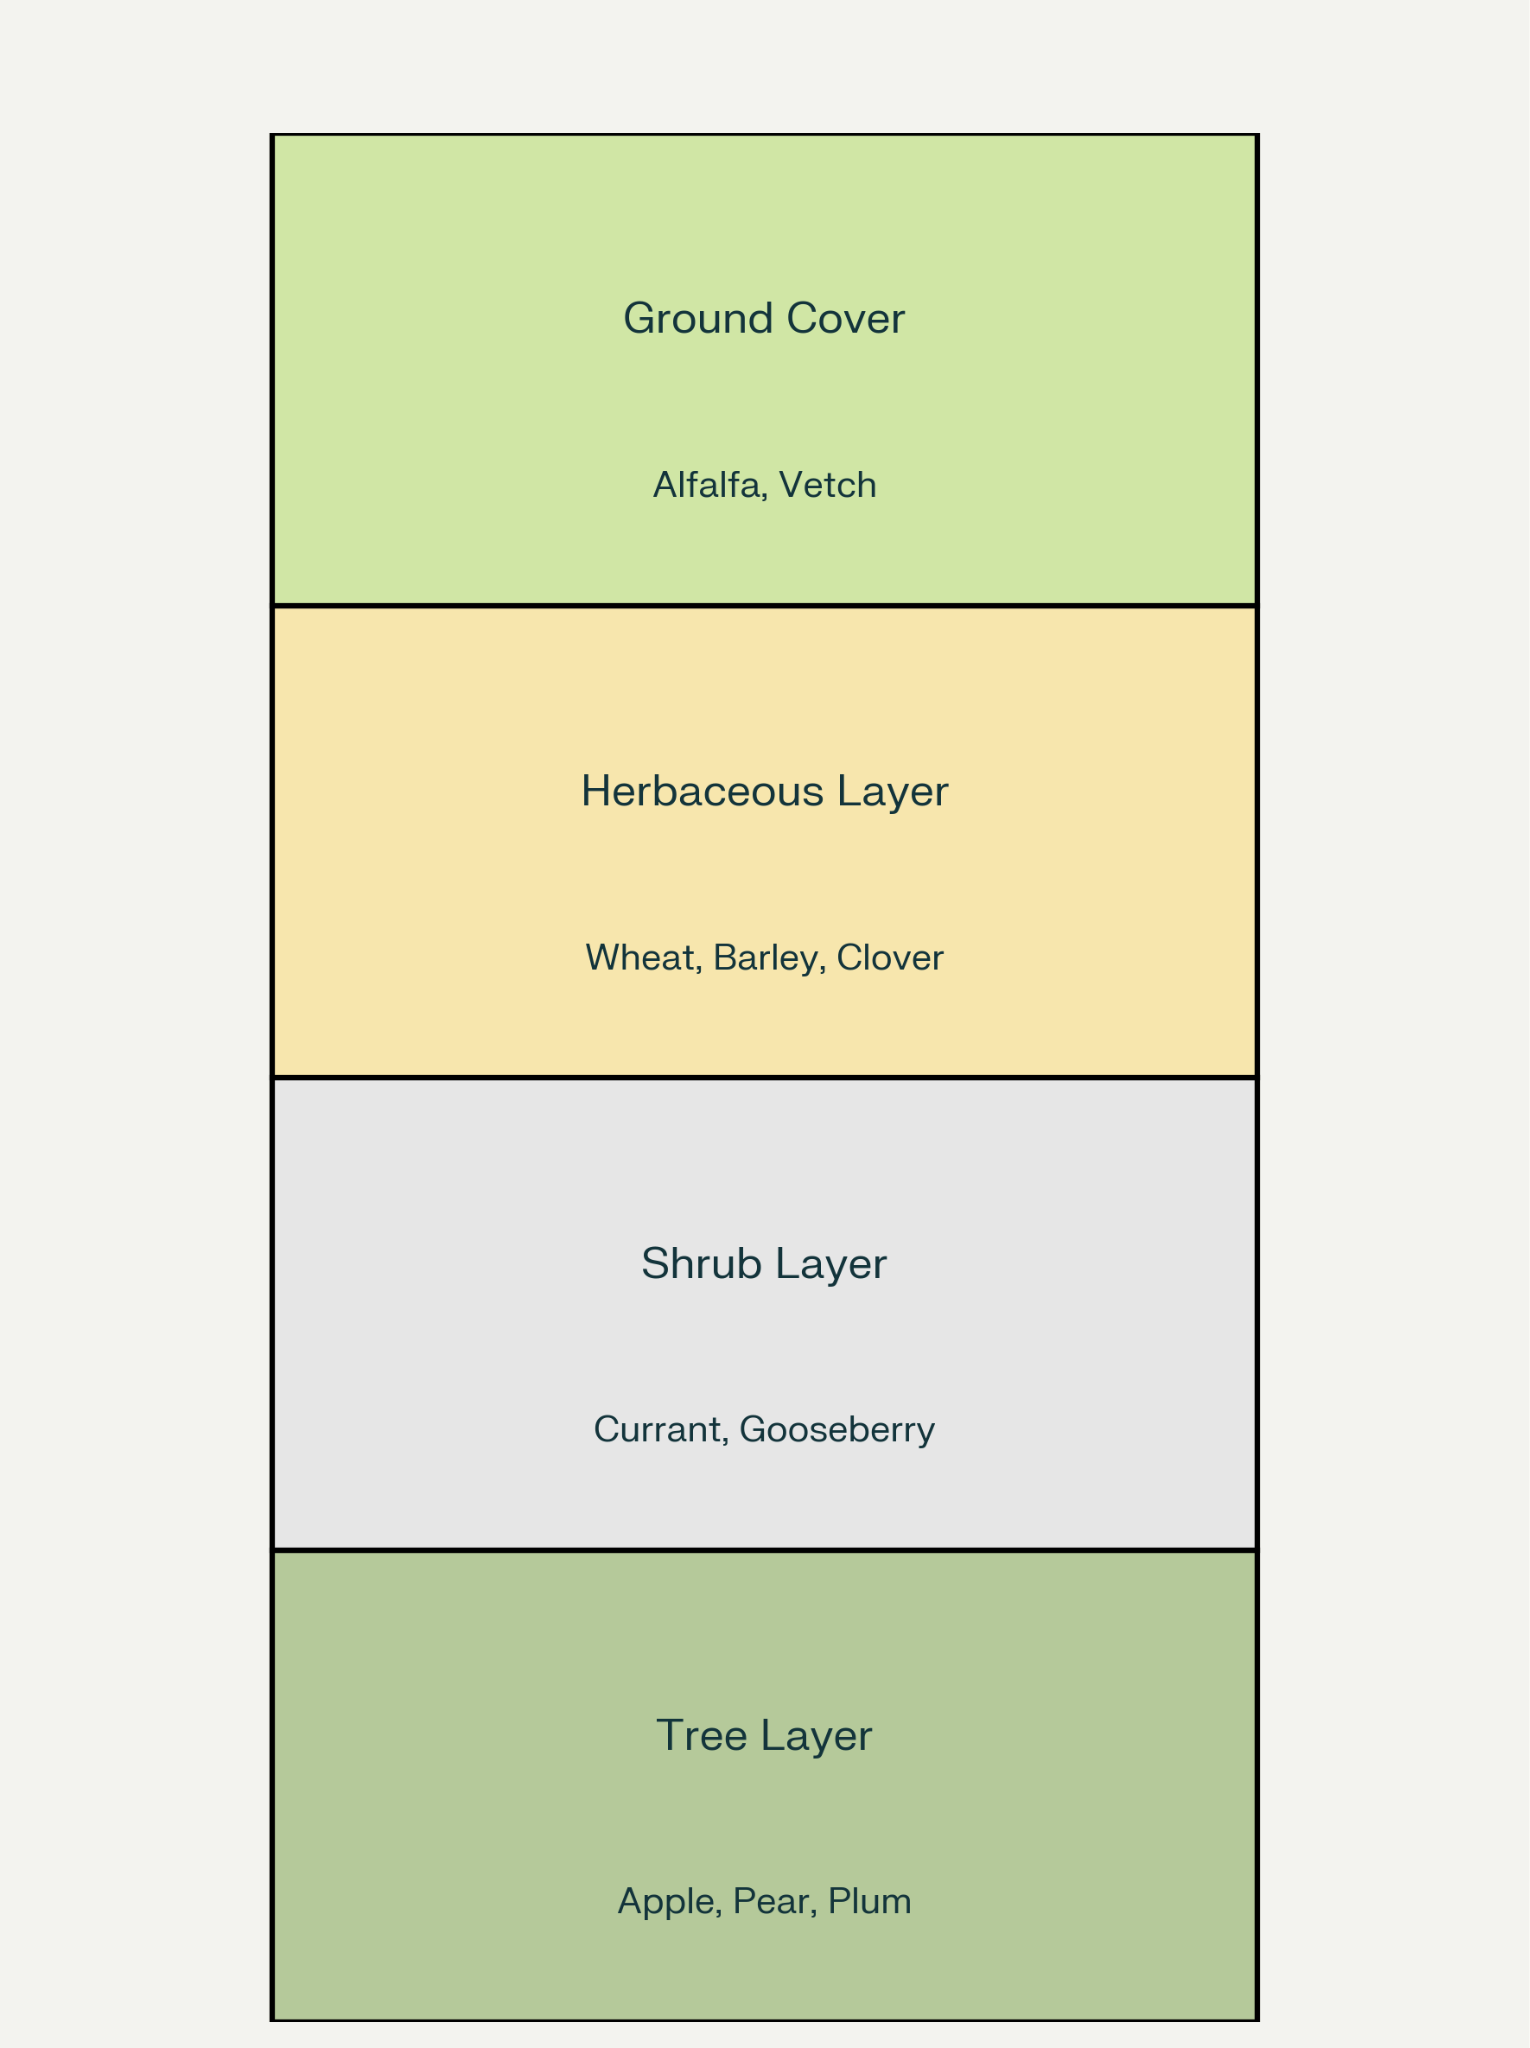
The figure below displays a simple 4-layer version of ZBNF for inter spatial cropping.

Figure 12 Simple Iteration of ZBNF By Author

This simplified version of interspatial cropping may be a useful tool in post conflict scenarios in terms of saving space, increasing efficiency as well as reducing costs.

According to comprehensive field research conducted by (B. Guruva Reddy, 2020) across 11 districts in Andhra Pradesh over three years.

The study concluded, “*At the farm level its economic benefits are far from the promises made. Of the three economic benefits promised (reduced costs, increased yields, and higher prices), ZBNF could meet the expectations only in the case of reduced costs. Yield rates decline during the initial years and farmers must wait for more than three years to achieve normal yields, let alone increased yields. And there is no price advantage.”* This reinforces the above constraint that ZBNF is not a perfect alternative. An interesting note on the same study displays sunflower yields reaching 90% post 3 years in ZBNF.

A crucial detail of this is that the study was conducted against traditional methods of

farming when farmers had access to input at market rates. So, we can reasonably assume

that even though ZBNF is against traditional models that are lackluster, it performs very

well in a post-conflict setting given the challenges that war brings.

The Figure below showcases the solution that ZBNF brings the current existing problems.

| **Problem** | **ZBNF Solution** | **Evidence** | **Source** |
| --- | --- | --- | --- |
| High Input Costs | Cost reduction of 3-41% through elimination of synthetic fertilizers | "Costs are lower by 3 to 41 per cent for CRZBNF crops" | (B. Guruva Reddy, 2020) |
| Soil Degradation | Enhanced soil biology and earthworm abundance | "Nutrient availability was also unaffected in ZBNF" | (Chandrasekaran, 2022) |
| Water Scarcity | 50-60% reduction in water consumption | "ZBNF processes require 50%–60% less water" | (Kasthuri, 2020) |
| Carbon Emissions | 55-85% reduction in CO2 emissions for irrigated crops | "Results in 55%–85% less emissions (1.4–6.6 Mt CO2e)" | (Kasthuri, 2020) |
| Energy Dependency | 45-70% less input energy for irrigated crops | "ZBNF requires 45%–70% less input energy" | (Kasthuri, 2020) |

Table 3 Possible Solution Matrix by ZBNF Implementation benchmarked against sources

While ZBNF offers significant advantages for post-conflict recovery, a balanced assessment must acknowledge its constraints. The transition period and yield implications require careful consideration, particularly given Ukraine's role in global food security (Rose Griffin, 2021) and (Sustainable Harvest International (SHI) Research Team, 2022).

| **Challenge** | **ZBNF Reality** | **Impact** | **Source** |
| --- | --- | --- | --- |
| Yield Reduction | 6-20% lower yields in 3rd year | Threatens food security | (B. Guruva Reddy, 2020) |
| Wheat Production | 17.7-59% production decline possible | Major food security risk | (Gulati S. D., 2024) |
| Labor Intensity | Higher labour requirements | Increased operational complexity | (Centre for Study of Science, 2020) |
| Nitrogen Deficiency | Only 39.51% of plant nitrogen needs met | Limits crop growth potential | (Gulati S. D., 2024) |
| Transition Period | 2-3 years of reduced productivity | Economic hardship during adoption | (B. Guruva Reddy, 2020) |

Table 4 Limitation and Constraints of ZBNF benchmarked against sources

Zero Budget Natural Farming presents both opportunities and challenges for post-conflict agricultural recovery. While studies project significant input cost reductions of 80-90% (Galba, 2019)projections on yield performance remains mixed, (B. Guruva Reddy, 2020) reports yield decreases of 6-20% in some implementations, while (Chandrasekaran, 2022)found yield improvements in specific regions supported by implementation studies (Rao, 2024).

To summaries, although ZBNF is not a perfect solution to a post conflict setting, the benefits still outweigh the costs incurred in adopting it. From increased soil health to meet ESG and sustainable standards to possible immense cost-saving offsets.

The best possible solution is to meet mid-way between conventional & ZBNF methods.

# Real Estate Implications of ZBNF

The implications are sound in logic, as more liquidity in any given local economy means more purchasing and debt-raising power with organic, sustainable, and high-yield farms to act as collateral for any financing. This opens the avenue for new residential and eventually commercial developments in smaller rural economies first.

An article by the *German Global Area of Studies* (Kurtenbach, 2018)highlights the environment and socio-economic status post-conflict of a nation, corroborated by development banking research (Giordano, 2011) they conclude ‘*Nations unlikely to see a clean break from violence to consent, from theft to production, from repression to democracy, or from impunity to accountability’.*

ZBNF requires a partial or a semi-stable environment with a few other conditions to take distressed land and turn it into value-added, sustainable, and diversified asset. *Authors Own Source*

The key aspect to consider with ZBNF is farmers possessing access to their own land for valuations and investment, ‘*Housing, Land, and Property Rights in Post-Conflict Reconstruction’* (Robertson, 2019)Discusses the centrality and contentiousness of Housing, Land, and Property (HLP) rights in post-conflict settings. It Explains restitution as a key mechanism for restoring economic/social stability by enabling productive land use.

The implementation challenges of ZBNF must be weighed against the broader context of post-conflict land governance. International experience suggests that secure property rights significantly influence agricultural recovery outcomes, as demonstrated in comparable post-conflict settings. (Christen, 2021)*.* (School William & Mary, 2024)

To back up the above claim with a proven paper, ‘Property Rights and Post-Conflict *Recovery (Iraq)* by **JDC** showcases projected evidence from Iraq showing that while property ownership itself didn't strongly predict IDP return, secure property rights (written documentation, absence of disputes) significantly increased the likelihood of return by 9 percent and property disputes decreased the likelihood of return by 14 percentage points, (Christen, 2021)*.*

The state of Ukraine launched the *Agriculture Recovery Inclusive Support Emergency* (World Bank, 2024), a grant and credit program launched and directed exactly at smallholder farmers and agri-food beneficiaries. The ARISE program, launched in October 2023 with World Bank support, exemplifies targeted interventions for smallholder recovery. With $2.6 billion in private capital mobilized against a $1.5 billion target, the program demonstrates strong market confidence in Ukraine's agricultural potential, though significant implementation risks remain (World Bank, 2024).

The above program aims to inject direct cash liquidity to farmers in Ukraine, given the scarcity of resources and increased costs in production. Providing an economical technique to small holder farms in situations like these would not only amplify the effects of the grant programs by allowing farmers to make better financial allocation decisions. This further reinforces the hypothesis that ZBNF can have significant impact on not just land evaluations but also the farmers themselves by freeing up financial capital for other purposes. The table below describes different risk and proposed ratings.

The figure below is a visual representation of the Rating approval of the ARISE Project (P180732) - World Bank ISR03184 (World Bank, 2024) for supporting agriculture in Ukraine.

| **Risk Category** | **Rating at Approval  (30 Oct 2023)** | **Last Approved Rating  (14 Aug 2024)** | **Proposed Rating** |
| --- | --- | --- | --- |
| Political and Governance | High | High | High |
| Macroeconomic | High | High | High |
| Sector Strategies and Policies | Moderate | Moderate | Moderate |
| Technical Design of Project or Program | Moderate | Moderate | Moderate |
| Institutional Capacity for Implementation and Sustainability | Substantial | Substantial | Substantial |
| Fiduciary | High | Substantial | Substantial |
| Environment and Social | Substantial | Substantial | Substantial |
| Stakeholders | Moderate | Moderate | Moderate |
| Overall | High | High | High |

Table 5 ARISE Rating Dates.( (World Bank, 2024)

Implementation Progress:

- Private capital mobilized: $2.6 billion (vs. $1.5 billion target).
- Overall risk rating: High, but implementation is rated "Satisfactory (World Bank, 2024)
- The Figure below highlights the Cumulative Disbursement FY24-25 of the ARISE Program.

Figure 13 Cumulative Disbursement FY24-25, World Bank ISR03184 Pg 7 (World Bank, 2024)

Figure 14 Loan Disbarment, World Bank ISR03184 Pg 7 (World Bank, 2024)

1. *“TF-C2986: $365 million with $318.70 million (87.31%) disbursed and $46.30 million remaining IBRD*-96050: $230 million fully disbursed (100%)” (World Bank, 2024).

# Conceptual Framework-

Academic literature presents contradictory findings regarding real estate land valuations with organic farming practices, (Veron, 2022)Contradicts the premise *- "organic land is currently sold at the same price as conventional land" despite superior environmental quality”.*

The objective of this research extends beyond creating a case study for Ukraine's post-conflict environment to developing a comprehensive framework for the possible implementation for organic, sustainable & scalable techniques in any conflict-ridden nation or state.

At the very bottom line ZBNF and other such organic methods tend to yield higher operational profitability according to (OECD, 2003) *"While yields tend to be lower on organic farms, and labour costs higher than conventional farms, profitability is generally higher, due to price premiums and support payments"*. Which makes it an attractive choice in conflict ridden states.

If ZBNF and its supporting organic models are to be implemented in a conflict-ridden state; post or current the target needs to check the following conditions.

- Be situated away from the direct frontline of conflict.
- Not be in vicinity of critical infrastructure such as Dams, main line irrigations systems, power plants & other such infrastructure; this maybe ignored if peace is returned.
- Have pre-existing farms or at least scientifically identified fertile land to farm.

These conditions were the same ones used to identify the best possible pilot region to simulate ZBNF and organic farms in Ukraine, as highlighted in the later sections of this paper.

# Conclusion

This comprehensive literature review projects that smallholder-centric approaches, informed by comparative post-conflict recovery analyses, offer a credible pathway for Ukraine's agricultural resurgence. The convergence of evidence from multiple post-conflict contexts (Cambodia, Rwanda, Sierra Leone) suggests that decentralized, low-input farming systems demonstrate superior resilience compared to capital-intensive approaches (Wiggins S. B., 2023) and (Christoplos, 2004). While Zero Budget Natural Farming (ZBNF) presents compelling operational and financial advantages, its impact will depend on capacity for localized adaptation amidst demographic shifts and latent structural risks. The findings presented here reinforce the necessity of targeting interventions not merely at yield, but at the broader restoration of rural economic health—making the case for integrated, context-sensitive recovery strategies as Ukraine’s most effective long-run lever.

# List of figures

[Figure 1 Change in Production & Area under Crops (Wiggins S. C., Farming after fighting: Agricultural recovery after conflict, 2023) 2](#_Toc208814542)

[Figure 2 Change to Area Under Crops (Wiggins S. C., Farming after fighting: Agricultural recovery after conflict, 2023) 3](#_Toc208814543)

[Figure 3 Matrix of Production Levels Post Conflict (Wiggins S. C., Farming after fighting: Agricultural recovery after conflict, 2023) 4](#_Toc208814544)

[Figure 4 Demographic Shift (State Statistics Service of Ukraine., 2022) 4](#_Toc208814545)

[Figure 5 Production Loss due to Increase in Input Price (FAO, 2023) 5](#_Toc208814546)

[Figure 6 Change in Area & Crop (FAO, 2023) 6](#_Toc208814547)

[Figure 7 Decrease in Grain & Oil Crops (FAO, 2023) 6](#_Toc208814548)

[Figure 8 Decrease in Revenue for Crop & Livestock (FAO, 2023) 7](#_Toc208814549)

[Figure 9 Enterprise Damage & Losses (FAO, 2023) 7](#_Toc208814550)

[Figure 10 War Related Losses in Ukraine Excluding Lost Income (Kotykova, 2025). 8](#_Toc208814551)

[Figure 11 Economic losses including income (Kotykova, 2025). 8](#_Toc208814552)

Figure 12 Simple Iteration of ZBNF By Author

[Figure 13 Cumulative Disbursement FY24-25, World Bank ISR03184 Pg 7 (World Bank, 2024) 14](#_Toc208814554)

[Figure 14 Loan Disbarment, World Bank ISR03184 Pg 7 (World Bank, 2024) 14](#_Toc208814555)

# List of tables

[Table 1 Agricultural Growth For Years Of Conflict And Years Since Conflict: Value Of Agricultural Production (Constant Terms) (Wiggins S. C., Farming after fighting: Agricultural recovery after conflict, 2023) 1](#_Toc208814556)

[Table 2 Change: Area Under Crops (Wiggins S. C., Farming after fighting: Agricultural recovery after conflict, 2023) 1](#_Toc208814557)

[Table 3 Possible Solution Matrix by ZBNF Implementation benchmarked against sources 11](#_Toc208814558)

[Table 4 Limitation and Constraints of ZBNF benchmarked against sources 11](#_Toc208814559)

[Table 5 ARISE Rating Dates.( (World Bank, 2024) 13](#_Toc208814560)

# References

Alonso-Martínez, D. J.-P.-G. (2024). Theoretical framework to foster and assess sustainable agriculture practices: Drivers and key performance indicators. *Environmental and Sustainability Indicators, 23*. doi:https://doi.org/10.1016/j.indic.2024.100178

Andrić Gušavac, B. M. (2024). Agricultural route efficiencies, based on Data Envelopment Analysis(DEA). *Acta Polytechnica Hungarica, 21*(4), 73-91. Retrieved from https://acta.uni-obuda.hu/AndricGusavac_Martic_Popovic_Savic_139.pdf

B. Guruva Reddy, V. R. (2020). Cost savings and outcomes of ZBNF for smallholder farmers. *74*(3), 323-329. doi:https://isaeindia.org/wp-content/uploads/2020/11/03-Article-M-Srinivasa-Reddy.pdf

Balcombe, K. F. (2008). An application of the DEA double bootstrap to examine sources of efficiency in Bangladesh rice farming. *Applied Economics, 40*(15), 1919-1925. doi:https://doi.org/10.1080/00036840600905282

Banker, R. D., & Cooper, W. W. (1984). Some models for estimating technical and scale inefficiencies in data envelopment analysis. *Management Science, 30*(9), 1078-1092. doi:https://doi.org/10.1287/mnsc.30.9.1078

Barry, P. J. (2012). Financial Management in Agriculture. *Pearson Education Inc.(7th ed.)*.

Batsurovska, I. &. (2022). Agricultural production efficiency in post-conflict settings: evidence from Ukraine. *53*(4), 512-525. doi:https://doi.org/10.17221/453/2021-AGRICECON

Bharucha, Z. P. (2020). Towards redesign at scale through Zero Budget Natural Farming in Andhra Pradesh, India. *International Journal of Agricultural Sustainability, 18*(1), 1-20. doi:https://doi.org/10.1080/14735903.2019.1694465

Brück, T. S. (2009). The impact of violent conflicts on households: What do we know and what should we know about war widows? *Oxford Development Studies, 37*(3), 289-309. doi:https://doi.org/10.1080/13600810903089174

Bulman, D. K. (2010). *What Explains Aid Project Success in Post-Conflict Situations.* Washington: World Bank Research Group. doi:https://openknowledge.worldbank.org/entities/publication/491fc6cd-c46c-5f67-ac06-0c94510c69e8

Centre for Study of Science, T. a. (2020). *Life cycle assessment of ZBNF and non-ZBNF: a study in Andhra Pradesh.* Bangalore: CSTEP.

Chandrasekaran, M. G. (2022). *Zero Budget Natural Farming in Andhra Pradesh Outperforms Conventional Agriculture.* Rome: Food and Agriculture Organization of the United Nations (FAO).

Chaudhary, D. T. (2024). Factors influencing market value of agricultural land and fair compensation. *Frontiers in Sustainability, 5*, 1492456. Retrieved from https://doi.org/10.3389/frsus.2024.1492456

Christen, R. P. (2021). *Property Rights and Post-Conflict Recovery: Theory and Evidence from IDP Return Movements in Iraq. .* Just Development Consortium (JDC): World Development, 144, 105494.

Christoplos, I. (2004). Agricultural rehabilitation in post-conflict areas. *Journal of Humanitarian Assistance, 3*. doi:https://sites.tufts.edu/jha/archives/45

Confalonieri, R. R. (2012). *Sensitivity analysis report: E-Agri project.* Retrieved from European Commission FP7: https://www.e-agri.info/pdf/D32.1_Sensitivity_Analysis_V1.1.pdf

Cooper, W. W. (2007). Data envelopment analysis: A comprehensive text with models, applications, references and DEA-solver software. *Springer*. doi:https://doi.org/10.1007/978-0-387-45283-8

Data, E.-E. S. (2025). European Soil Database v2.0 (vector and attribute data). *European Commission Joint Research Center.*

Deininger, K. S., & Carletto, C. (2023). Land markets and agricultural development in post-conflict settings. *World Development*, 163. doi:106145

Development, E. B. (2024). Supporting Ukraine's Agricultural Recovery., (pp. 14-17). doi:https://www.ebrd.com/home/news-and-events/news/2024/ebrd-commits-new-funding-and-support-for-ukraine-at-recovery-conference.html

Driels, M. R. (2004). Determining the number of iterations for Monte Carlo simulations of weapon effectiveness. *Military Operations Research, 9*(2), 37-51. doi:https://doi.org/10.5711/morj.9.2.37

Duddigan, S. C. (2022). Impact of zero budget natural farming on crop yields in Andhra Pradesh, SE India. Sustainability. *Sustainability, 14*(3), 1689. doi:https://doi.org/10.3390/su14031689

Even, B. T., & Pham, H. T. (2024). Defining barriers to food systems sustainability: A novel interdisciplinary framework. *Frontiers in Sustainable Food Systems, 8*, 1453999. doi:https://doi.org/10.3389/fsufs.2024.1453999

FAO. (2023). *Ukraine: Impact of the war on agricultural enterprises (Findings of a nationwide survey of agricultural enterprises with land up to 250 hectares, January–February 2023).* Rome: Food and Agriculture Organization of the United Nations. doi:https://doi.org/10.4060/cc5755en

FAO. (2024). *Ukraine: Impact of the war on agricultural enterprises.* Rome: Food and Agriculture Organization of the United Nations. doi:https://doi.org/10.4060/cc5755en

Fiduciaries, N. C. (2023). *NCREIF Farmland Index: Annual Report.* Chicago: NCREIF. doi: https://user.ncreif.org/data-products/farmland/

Flint, A. (2022). *Return on Investment: Research Links Climate Action with Land and Property Value Increases.* Land Lines, Lincoln Institute of Land Policy. doi: https://www.lincolninst.edu/publications/articles/research-links-climate-action-land-property-value-increases

Food & Argiculture Organisation of United Nations. (2022). *Impact of the war on agriculture and rural livelihoods in Ukraine.* Rome: FAO UN. doi:https://doi.org/10.4060/cc3311en

Francic, D. S. (2025). *Ukraine: Oilseeds and Products Annual.* United States Department of Agriculture, Foreign Agricultural Service. doi:https://apps.fas.usda.gov/newgainapi/api/Report/DownloadReportByFileName?fileName=Oilseeds+and+Products+Annual_Kyiv_Ukraine_UP2025-0008

Frolov, S. (2024). The Ukrainian property market and valuation after two years of war. *TEGOVA Spring General Assembly.* Bucharest: Ukrainian Society of Appraisers (USOA) & Ukrainian Association of Bank Valuation Specialists (UABVS). doi: https://tegova.org/static/bcf7c52e1c6cfe121395a2b4f04e580f/1.%20Serhii%20Frolov%20-%20UABVS%20&%20%20USOA%20-%20The%20Ukranian%20Property%20Market%20and%20valaution%20after%20two%20yeras%20of%20War%20-%20Bucharest%2010%20May%202024.pdf

Galba, G. U. (2019). *Cost Dynamics and Yield Performance under Zero Budget Natural Farming in India.* International Journal of Agricultural Sustainability,.

Gasanov, M. P., Naumov, V., Oseledets, I., & Krzhizhanovskaya, V. V. (2020). Sensitivity analysis of soil parameters in crop model supported with high-throughput computing. In V. V. Krzhizhanovskaya (Ed.), *Computational Science – ICCS 2020* (Vol. LNCS 12138, pp. 731-741). Springer. doi:https://doi.org/10.1007/978-3-030-50436-6_54

Giordano, T. (2011). *Agriculture and economic recovery in post-conflict countries: Lessons we never learn.* Development Bank of Southern Africa. Development Planning Division. doi:https://www.dbsa.org/sites/default/files/media/documents/2022-11/Agriculture%20and%20Economic%20Recovery%20in%20Post-conflict%20Countries%20-%202011_0.pdf

Gulati, A. S. (2019). *Revitalizing Indian agriculture and boosting farmer incomes.* New Delhi: Indian Council for Research on International Economic Relations (ICRIER). doi:https://library.oapen.org/bitstream/id/1fc72171-b49f-4bc9-9dc9-eb5b373b9b95/9789811593352.pdf

Gulati, S. D. (2024). Zero Budget Natural Farming Implications for Sustainability, Profitability, and Food Security. *NABARD Research Study No. 43*, 39-45. doi:https://icrier.org/publications/zero-budget-natural-farming-implications-for-sustainability-profitability-and-food-security/

Horovetska, O. &. (n.d.). *Agriculture in Ukraine: Economic and Political Frameworks.* Berlin: Stiftung Wissenschaft und Politik. doi:https://www.swp-berlin.org/publikation/agriculture-in-ukraine-economic-and-political-frameworks

ICARDA. (2017). *Post-conflict agricultural reconstruction: lessons from the Middle East.* Beirut, Lebanon & Cairo, Egypt: ICARDA—International Center for Agricultural Research in the Dry Areas. doi:https://mel.cgiar.org/reporting/download/hash/c744a1cfbb1a140e4ca4930b7b791a0b

Isaac, D. O. (2024). Enhancing property valuation in post-war recovery contexts. *Smart Cities, 7*(4), 1776-1801. doi:1033990

Ivanova, I. &. (2025). The transformation of demand in the residential property market in wartime Ukraine. *European Valuer Journal*(35), 12–19. Retrieved from https://tegova.org/static/1834a430313271b6b1bb840554d1ebcd/European%20Valuer%20Journal%20(35)%20March%202025%20(mobile%20version).pdf

Jin, C. L., Xiao, X., & Dong, J. (2019). A Monte Carlo simulation-based assessment of regional agricultural drought risk in China. *Agricultural Systems, 172*, 82-90. doi:https://doi.org/10.1016/j.agsy.2019.01.007

Kasthuri, K. C. (2020). *Life Cycle Assessment of ZBNF and Non-ZBNF: A Study in Andhra Pradesh.* Amaravati: Rythu Sadhikara Samstha. doi:https://apcnf.in/wp-content/uploads/2020/05/LIFE-CYCLE-ASSESSMENT-OF-ZBNF-AND-NON-ZBNF-A-STUDY-IN-ANDHRA-PRADESH.pdf

Khadse, A. R. (2018). Taking agroecology to scale: The zero budget natural farming peasant movement in Karnataka, India. *Journal of Peasant Studies, 45*(1), 192-219. doi:https://doi.org/10.1080/03066150.2016.1276450

Klymenko, O. S. (2023). Risk assessment for agricultural holdings in Ukraine. *Agricultural Economics, 69*(2), 89–104. doi: https://doi.org/10.17221/317/2022-AGRICECON

Koçak, D. (2019). A method to increase the power of Monte Carlo method: Increasing the number of iteration. *Pedagogical Research, 4*(4), em0047. doi:https://doi.org/10.29333/pr/6258

Konar, M. L. (2020). Price premiums for organic products: evidence from Indian markets. *Journal of Agricultural Economics,, 71*(1), 142–158. doi:https://doi.org/10.1111/1477-9552.12391

Kotykova, O. B. (2025). *Agriculture in Ukraine: Regional and global impacts of the war.* European Countryside, 17(1), 204-227. doi:102478

Kulish, H. (2025, February 14). *Damages and Losses to Agriculture in Ukraine.* Kyiv School of Economics. doi:https://eyp.org/content/uploads/2025/05/a-sustainable-tomorrow_youth-visions-for-rebuilding-ukraine.pdf#page=41

Kumar, S. K. (2024). Natural farming in India: A sustainable alternative to conventional agricultural practices. *Farming & Management, 150*, 63-65. doi:https://doi.org/10.31830/2456-8724.2024.fm-150

Kurtenbach, S. &. (2018). Understanding the relation between war economies and post-war crime. *GIGA German Institute of Global and Area Studies, 3*(1), 1-8. doi:https://doi.org/10.1080/23802014.2018.1475240

Latruffe, L. (2010). Competitiveness, productivity and efficiency in the agricultural and agri-food sectors. *OECD Food, Agriculture and Fisheries Papers, 30*, 5-56. doi:https://doi.org/10.1787/5km91nkdt6d6-en

Lee, C. K. (2021). Determinants of farmland prices and their local variation. *Bulletin of Geography. Socio-economic Series,, 54*, 77-87. doi:https://doi.org/10.2478/bog-2021-0034

Li, H. Y., & Cheng, E. W. (2005). A GIS‐based site selection system for real estate projects. *Construction Management and Economics, 23*(8), 839-848. doi:https://doi.org/10.1080/01446190500184649

M.Bogonos, A. R. (2024). *Agricultural Outlook Ukraine 2024–2033.* Kyiv School of Economics. doi:https://kse.ua/wp-content/uploads/2024/04/UA-Outlook-2024-2033-Report-1.pdf https://kse.ua/wp-content/uploads/2024/03/Outlook-2024-2033.pdf

Manners, R. B., Bahati, L., Rurinda, J., Shukla, A., & Mugambi, I. (2025). A farm typology development cycle: From empirical development through validation, to large-scale organisational deployment. *Agricultural Systems, 224*, 104001. doi:https://doi.org/10.1016/j.agsy.2024.104001

Miller, M. B. (2024). Multi-scale theory of change in transition design: A case study in sustainable agricultural systems. *She Ji: The Journal of Design, Economics, and Innovation, 10*(4), 523-548. doi:https://doi.org/10.1016/j.sheji.2024.08.003

Neelipally, R. T., Kotta, K., & Thomas, L. (2024). Defining boundaries and conceptual frameworks for sustainable farming systems. *Journal of Soil and Water Conservation, 79*(4), 416A-424A. doi:https://doi.org/10.2489/jswc.2024.0416A

Nivievskyi O., N. R. (2024). An interim assessment of the war-induced damages and losses in Ukraine’s agriculture. *005*(12). doi: https://doi.org/10.3929/ethz-b-000665476

Noumir, A. &. (2022). Risk and return of heterogenous farmland locations and qualities. *The International Food and Agribusiness Management Review, 25*(4), 635-650. doi:https://doi.org/10.22434/ifamr2021.0051

Oberle, W. F. (2015). *Monte Carlo Simulations: Number of Iterations and Accuracy.* ARL-TN-0684, U.S. Army Research Laboratory. doi:https://apps.dtic.mil/sti/pdfs/ADA621501.pdf

OECD. (2003). *Organic Agriculture: Sustainability, Markets and Policies.* OECD Publishing. doi:https://doi.org/10.1787/9789264101500-en

Oleg Nivievskyi, R. N. (2024). An Interim Assessment of the War-Induced Damages and Losses in Ukraine’s Agriculture. *Ukrainian Analytical Digest, No. 005*. doi:https://doi.org/10.3929/ethz-b-000665476

Omeniuk, V. (2023). Current state assessment and development perspectives of the agricultural sector of Ukraine in the post-war conditions. *Collection of Scientific Papers "Scientific Notes", 33*(4), 109-120. doi: https://doi.org/10.33111/vz_kneu.33.23.04.09.06

Ong, T. W. (2020). Agroecological transitions: A mathematical perspective on a transdisciplinary problem. *Frontiers in Sustainable Food Systems, 4*(91). doi:https://doi.org/10.3389/fsufs.2020.00091

Özerdem, A. R. (2016). *Challenging Post-conflict Environments: Sustainable Agriculture.* London: Routledge. doi:https://doi.org/10.4324/9781315686623

Park, J. H., & Lee, Y. (2024). Post-conflict economic recovery and land policy in South Korea between 1948 and the early 1960s. *Land Use Policy, 141*. doi:https://doi.org/10.1016/j.landusepol.2024.107151

Pysar, N. &. (2020). Conflict impacts on agricultural development: evidence from eastern Ukraine. *European Review of Agricultural Economics, 47*(3), 1023-1050. doi:https://doi.org/10.1093/erae/jbz039

Rao, D. M. (2024). Evaluation of Zero Budget Natural Farming (ZBNF) initiatives in Andhra Pradesh 2020-21. *Agro-Economic Research Centre, Andhra University.* doi:https://www.rdais.gov.in/static/ZBNF-Report.pdf

Richardson, J. W. (2008). *Simulation for applied risk management with an introduction to the Excel add-in Simetar.* Retrieved from Texas A&M University Department of Agricultural Economics: https://afpc.tamu.edu/courses/643/2017/simulation/Textbook-Simulation-Applied-Risk-Manual.pdf

Robertson, O. K. (2019). *Housing, Land, and Property Rights in Post-Conflict Reconstruction. William & Mary Law Review, 50(6).* William & Mary Law School: Williamsburg, VA. doi:https://law.wm.edu/academics/intellectuallife/researchcenters/postconflictjustice/student-programs/student-international-papers/papers/housing,-land,-and-property-rights-in-post-conflict-reconstruction---olivia-robertson.pdf

Rohwerder, B. (2017). *Conflict analysis of Ukraine.* K4D Helpdesk Report No. 246. doi:https://opendocs.ids.ac.uk/opendocs/handle/20.500.12413/12803

Roman N., S. Z. (2023). *Agricultural War Damages, Losses, and Needs Review.* Kyiv School of Economics. KSE Agrocenter. doi:https://kse.ua/wp-content/uploads/2024/02/RDNA3_eng.pdf

Román, A. A. (2024). *Ukrainian agriculture: From Russian invasion to EU integration.* European Parliamentary Research Service. Directorate-General for External Policies, European Parliament,. doi:https://www.europarl.europa.eu/RegData/etudes/BRIE/2024/760432/EPRS_BRI(2024)760432_EN.pdf

Rose Griffin, H. S. (2021). *Zero Budget Natural Farming in Andhra Pradesh: A Review of Evidence, Gaps, and Future Considerations.* Tufts University CREATE Solutions for a Changing World, Medford, MA. doi:https://createsolutions.tufts.edu/wp-content/uploads/2021/12/CREATE_ZBNF_Rose_Halstead_Griffin.pdf

School William & Mary, W. (2024). Housing, land, and property rights in post-conflict reconstruction. *William & Mary Law Review, 2*, 345-376. doi:https://scholarship.law.wm.edu/wmlr/vol65/iss2/3/

Seufert, V. R. (2017). Many shades of gray—The context-dependent performance of organic agriculture. *Science Advances, 3*(3). doi:101126

Sharma, S. (2024). Sustainable agriculture and its practices: A review. Turkish Journal of Agriculture. *Food Science and Technology, 12*(12), 2631–2639. doi:https://doi.org/10.24925/turjaf.v12i12.2631-2639.6622

Simar, L. &. (2006). Estimation and inference in two-stage, semi-parametric models of production processes. *Journal of Econometrics, 136*(1), 31-64. doi:https://doi.org/10.1016/j.jeconom.2005.07.009

Simar, L. &. (2007). Estimation and inference in two-stage, semi-parametric models of production processes. *Journal of Econometrics, 136*(1), 31-64. doi:https://doi.org/10.1016/j.jeconom.2005.07.009

Skrimizea, E. (2020). Sustainable agriculture: Recognizing the potential of conflict as a positive driver for transformative change. *Ecological Economics*, 169. doi:https://doi.org/10.1016/j.ecolecon.2019.106526

Skydan, O. D. (2023). The state of the agricultural sector in Ukraine during wartime: The case of farmers. *Scientific Development of European Countries, 26*(6), 134-145. doi:https://doi.org/10.48077/scihor6.2023.134

Sobolev, D. &. (2024). *Ukraine: Oilseeds and Products Annual.* Kyiv: United States Department of Agriculture, Foreign Agricultural Service. doi:https://apps.fas.usda.gov/newgainapi/api/Report/DownloadReportByFileName?fileName=Oilseeds+and+Products+Annual_Kyiv_Ukraine_UP2025-0008

Stashkevych, I. (2025). Analysis of food security in Ukraine. *Scientific Development of European Countries, 4*. doi:1035774

State Statistics Service of Ukraine. (2022). *Labour force, employment and unemployment: Statistical collection 2006–2021.* Kyiv: State Statistics Service of Ukraine. doi:https://stat.gov.ua/sites/default/files/2024-04/Statistical%20publication%20Labour%20force%20of%20Ukraine%20%202020.pdf

Sustainable Harvest International (SHI) Research Team. (2022). *Organic Farming Adaptations to Different Contexts.* Belize: SHI Research. doi:https://sustainableharvest.org/impact/research/

Telles, T. S. (2021). Conservation practices and agricultural land value: Empirical evidence from Brazil. *Empirical evidence from Brazil. Land Use Policy*, 104. doi:https://doi.org/10.1016/j.landusepol.2020.105377

Toma, P. M. (2017). A non-parametric bootstrap-data envelopment analysis approach for environmental policy planning and management of agricultural efficiency in EU countries. *Ecological Indicators*, 132-143. doi:https://doi.org/10.1016/j.ecolind.2017.07.049

UK., S. (2022). *ESG factors in rural land valuation.* London: Savills Research. doi:https://www.savills.co.uk/research_articles/229130/320346-0

Veron, E. (2022). Comparative analysis of revenue and land prices between organic and conventional farming. *96th Annual Conference of the Agricultural Economics Society.* Belgium: Agricultural Economics Society. doi:https://ageconsearch.umn.edu/record/320734/files/Emilien_Veron_AES_VERON_comparative_analysis_organic_farmer.pdf

Wiggins, S. B. (2023). *Farming after fighting: Agricultural recovery after conflict.* London: SPARC Evidence Review,ODI. doi:https://www.sparc-knowledge.org/sites/default/files/documents/resources/farming-after-fighting_-report.pdf

Wiggins, S. C. (2023). *Farming after fighting: Agricultural recovery after conflict.* Supporting Pastoralism and Agriculture in Recurrent and Protracted Crises (SPARC). London: ODI. doi:https://www.sparc-knowledge.org/sites/default/files/documents/resources/farming-after-fighting_-report.pdf

Wiggins, S. C. (2023). *Farming after fighting: Agricultural recovery after conflict.* Supporting Pastoralism and Agriculture in Recurrent and Protracted Crises (SPARC). ODI. doi:https://www.sparc-knowledge.org/sites/default/files/documents/resources/farming-after-fighting_-report.pdf

Witzke, H. P. (2024). Sustainable land management enhances ecological and economic multifunctionality in European agricultural systems. *Nature Communications, 15*. doi:101038

World Bank . (2025). *Ukraine Recovery and Reconstruction Needs Assessment released.* The World Bank, the Government of Ukraine, the European Union, the United Nations. doi:https://openknowledge.worldbank.org/server/api/core/bitstreams/96bd9c94-c327-49b4-8aff-fe125686f04e/content

World Bank. (2023). *Ukraine Agriculture Recovery Inclusive Support Emergency (ARISE) Project: Implementation Status & Results Report (P180732).* World Bank Group. doi:https://documents1.worldbank.org/curated/en/099101923095537231/pdf/BOSIB0ba93e6360030a1f50cd2b8325e6e5.pdf

World Bank. (2024). *Project Information Document: Agriculture Recovery Inclusive Support Emergency (ARISE).* Washington, DC: World Bank. doi:https://documents.worldbank.org/en/publication/documents-reports/documentdetail/099072923124580381/p1807320fca7960a08a3a0ac96e3c3a2e8

World Bank. (2025). *Ukraine Fourth Rapid Damage and Needs Assessment (RDNA4), February 2022 – December 2024.* World Bank;Ukraine, Government of; Union, European; Nations, United. doi:https://hdl.handle.net/10986/42908

Zahm, F. A., Barbier, J.-M., Carayon, D., Del'homme, B., Gafsi, M., Gasselin, P., . . . R. (2024). Assessing farm sustainability: The IDEA4 method, a conceptual framework combining dimensions and properties of sustainability. *Cahiers Agricultures, 33*, 10. doi:101051

Zawalińska, K. W., Kobus, P., & Bańkowska, K. (2022). A framework linking farming resilience with productivity: Empirical validation from Poland in times of crises. *Sustainability Science, 17*(1), 81-103. doi:https://doi.org/10.1007/s11625-021-01047-1
